# Supplementary material for: Ruthenium/Yb(OTf)3-cocatalyzed dehydrogenative synthesis of 14-substituted-14-H-dibenzo[a,j]xanthenes from β-naphthol and alcohols
Source: Royal Society of Chemistry journal article supplement (doi:10.1039/c4ra00039k), 2014-01-01

# Supplementary Information

## Ruthenium/Yb(OTf)<sub>3</sub>-Cocatalyzed Dehydrogenative Synthesis of 14-substituted-14-*H*-dibenzo[*a,j*]xanthenes from *β*-Naphthol and Alcohols

Xiaoting Wang<sup>a</sup>, Mengmeng Chen<sup>a</sup>, Feng Xie<sup>a</sup>, Min Zhang<sup>\*a,b</sup>

<sup>a</sup>Jiangnan University, School of Chemical & Material Engineering Wuxi 214122,  
Peoples R China

<sup>b</sup>South China University of Technol, School of Chemistry & Chemical Engineering,  
381 Wushan Rd, Guangzhou 510640, Guangdong, Peoples R China

### Table of contents

|                                                  |        |
|--------------------------------------------------|--------|
| General information                              | S2     |
| Typical procedure for the synthesis of <b>3a</b> | S2     |
| NMR spectra of the obtained compounds            | S3-S24 |

## General information

All the obtained products were characterized by melting points (m.p),  $^1\text{H-NMR}$ ,  $^{13}\text{C-NMR}$  infrared spectra (IR), the  $^1\text{H-NMR}$  spectra of the known compounds were found to be identical with the ones reported in the literatures. Additionally, the new products were further determined by high resolution mass spectra (HR-MS). Melting points were measured on an Electrothermal SGW-X4 microscopy digital melting point apparatus and are uncorrected; IR spectra were recorded on a FTLA2000 spectrometer;  $^1\text{H-NMR}$  and  $^{13}\text{C-NMR}$  spectra were obtained on Bruker-400. Chemical shifts were reported in parts per million (ppm,  $\delta$ ) downfield from tetramethylsilane. Proton coupling patterns are described as singlet (s), doublet (d), triplet (t), multiplet (m); High-resolution mass spectra (HRMS) were recorded on a JEOL JMS-600 spectrometer. TLC was performed using commercially prepared 100-400 mesh silica gel plates (GF254), and visualization was effected at 254 nm; All the reagents were purchased from commercial sources (J&KChemic, TCI, Fluka, Acros, SCRC), and used without further purification.

## Typical procedure for the synthesis of **3a**

In a schlenk tube equipped with a magnetic stirrer bar, benzyl alcohol **1a** (1.5 mmol, 162.2 mg),  $\beta$ -naphthol **2a** (1 mmol, 144.2 mg),  $[\text{P}^{\wedge}\text{O}]_2\text{Cl}_2\text{Ru}$  (Cat 5, 0.005 mmol, 3.8 mg) and  $\text{Yb}(\text{OTf})_3$  (0.05 mmol, 31.0 mg) and toluene (1 mL) were introduced successively. The resulting mixture was stirred at 110 °C for 16 h without insert any gas protection. After cooling down to room temperature, the reaction solvent was removed under vacuum, the residue was directly purified by flash chromatography on silica gel eluting with petroleum ether : ethyl acetate (30 : 1) to give 14-phenyl-14-*H*-dibenzo[*a,j*]xanthene **3a** as a white solid (148 mg, 83%).

## NMR spectra of the obtained compounds

### <sup>1</sup>H-NMR of 3a

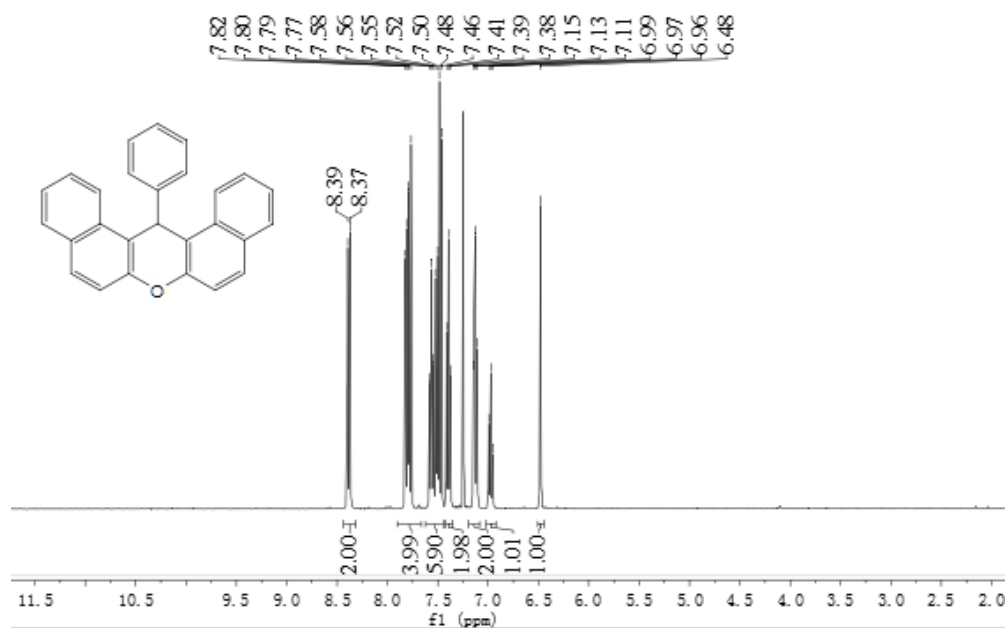

### <sup>13</sup>C-NMR of 3a

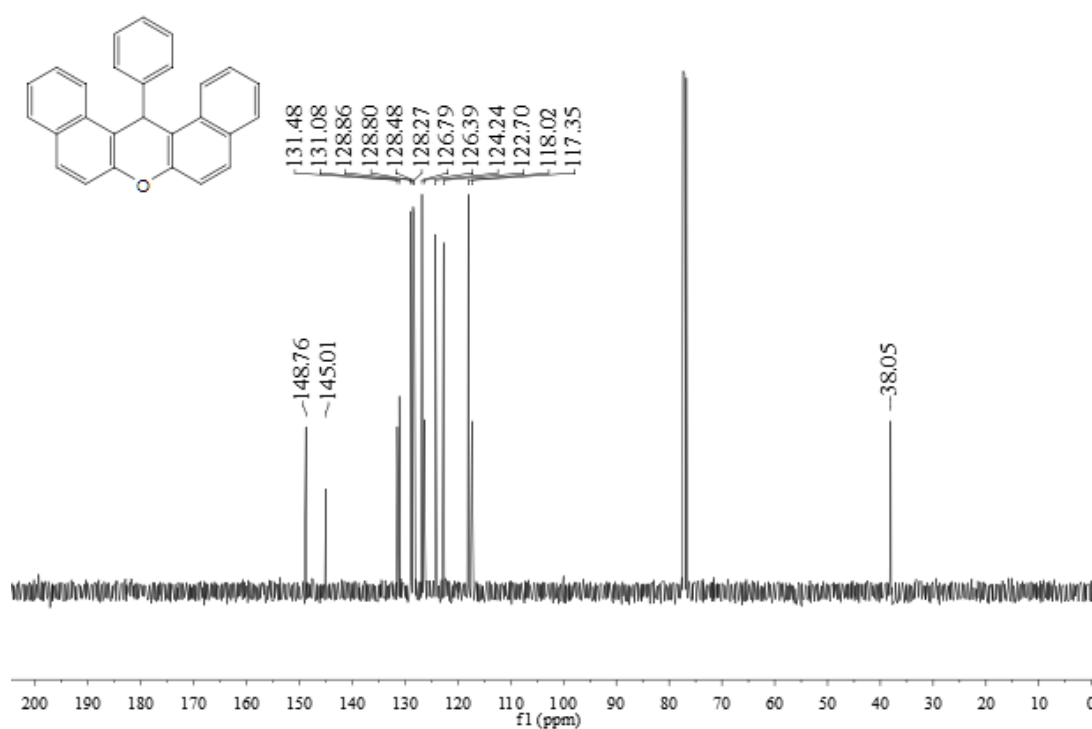

### <sup>1</sup>H-NMR of 3b

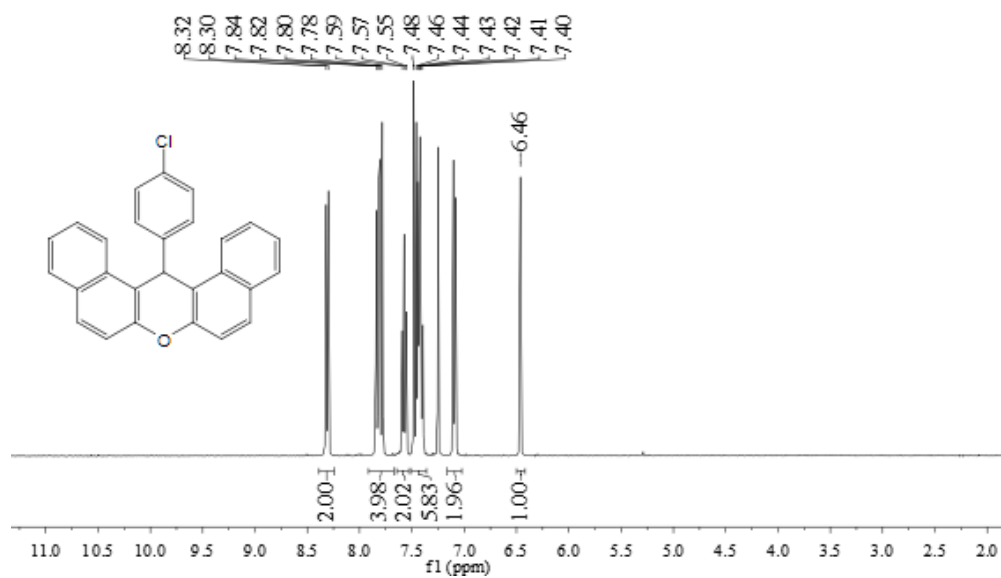

### <sup>13</sup>C-NMR of 3b

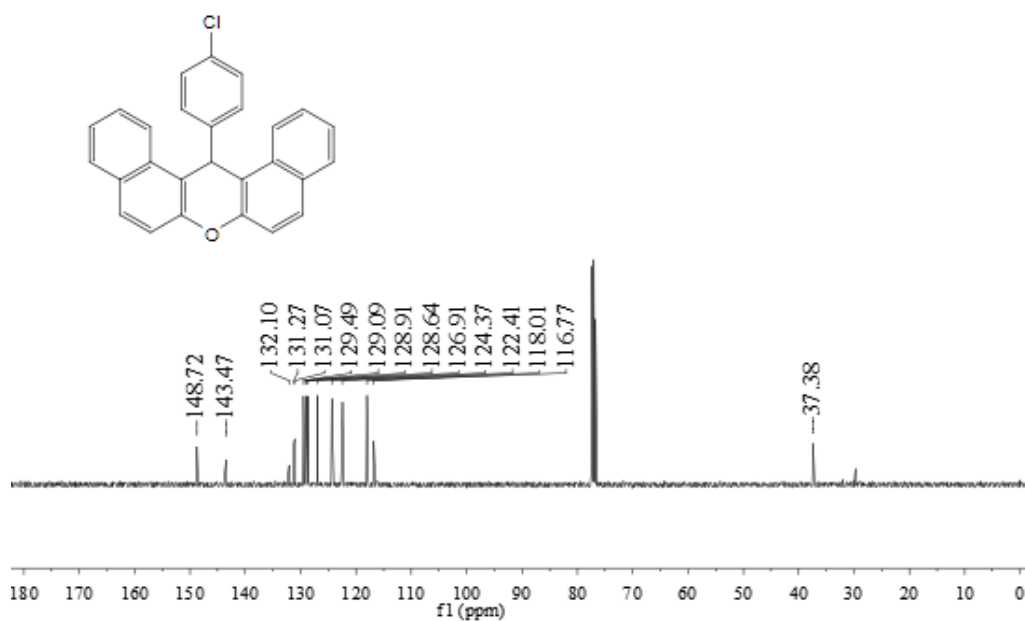

### <sup>1</sup>H-NMR of 3c

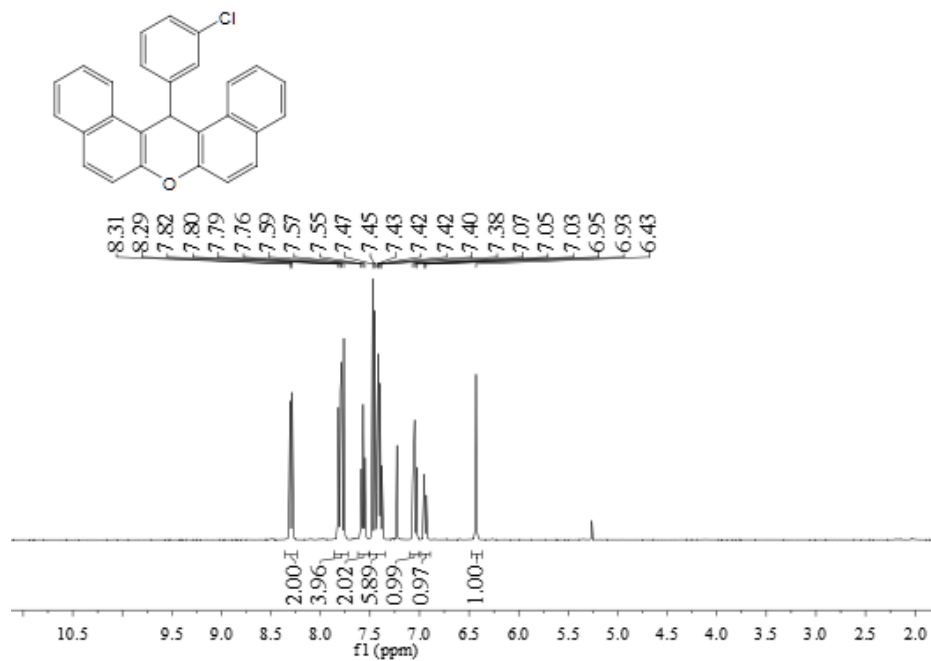

### <sup>13</sup>C-NMR of 3c

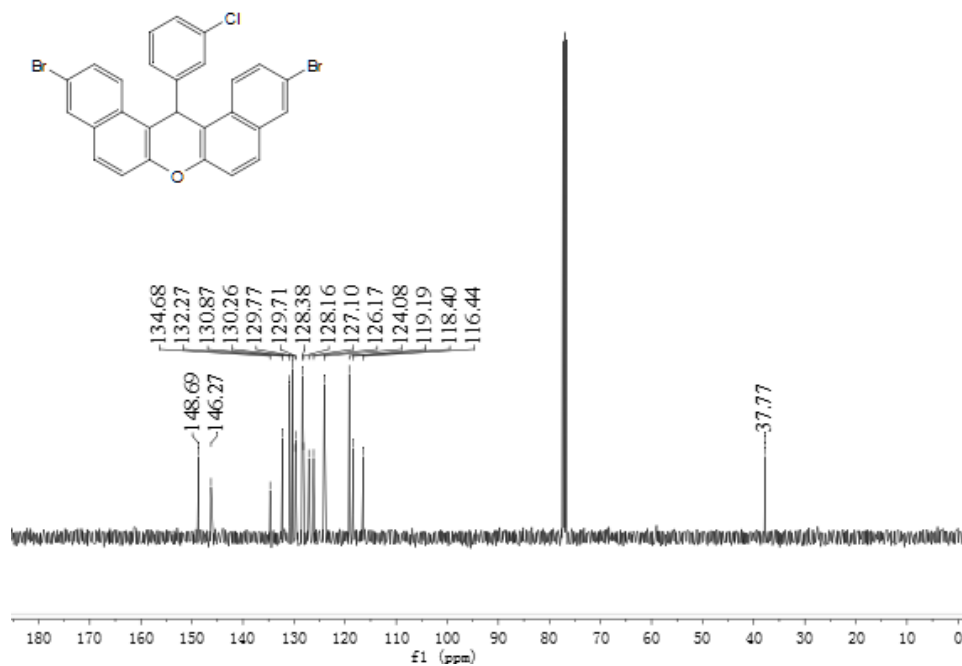

### <sup>1</sup>H-NMR of 3d

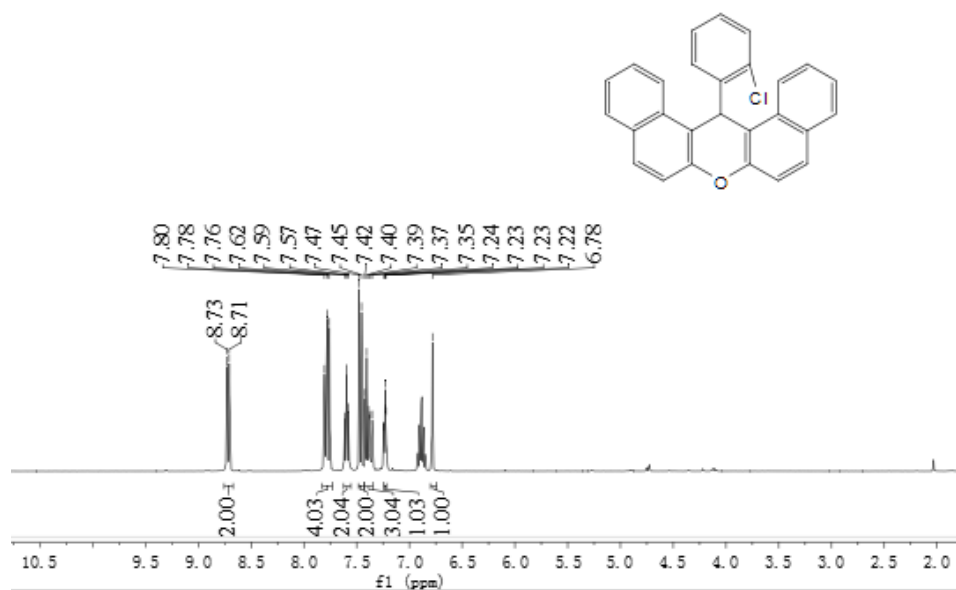

### <sup>13</sup>C-NMR of 3d

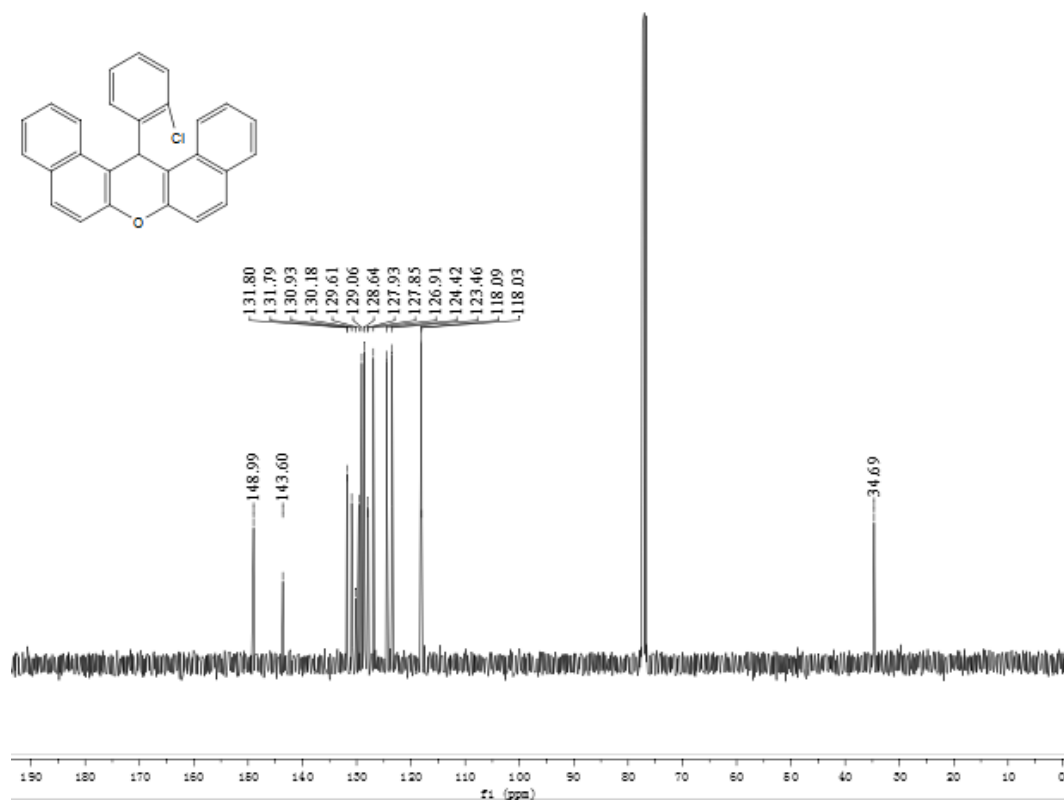

### <sup>1</sup>H-NMR of 3e

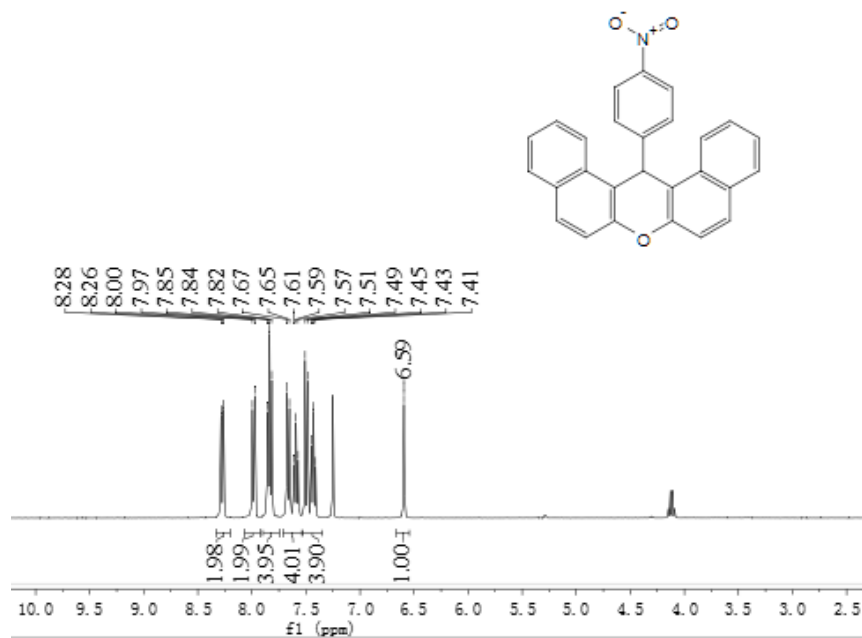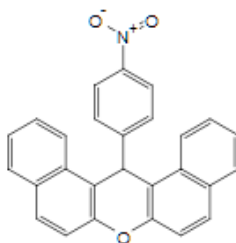

### <sup>13</sup>C-NMR of 3e

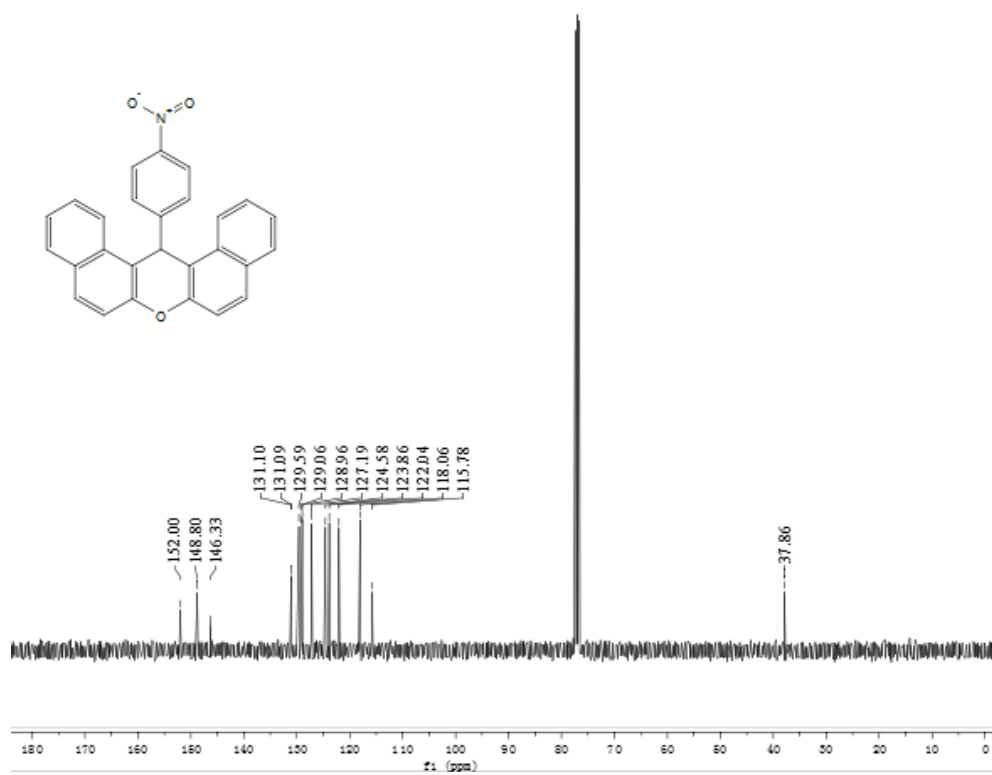

### <sup>1</sup>H-NMR of 3f

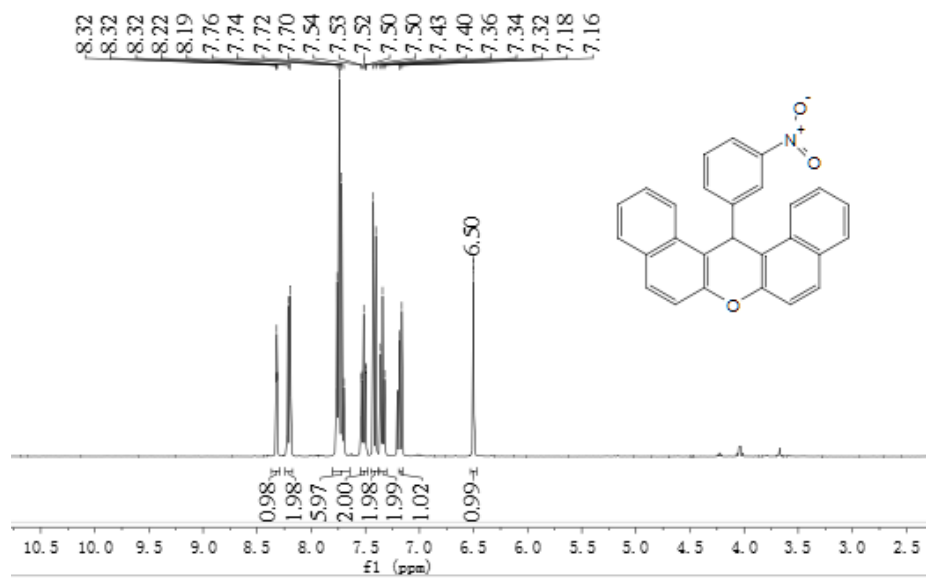

### <sup>13</sup>C-NMR of 3f

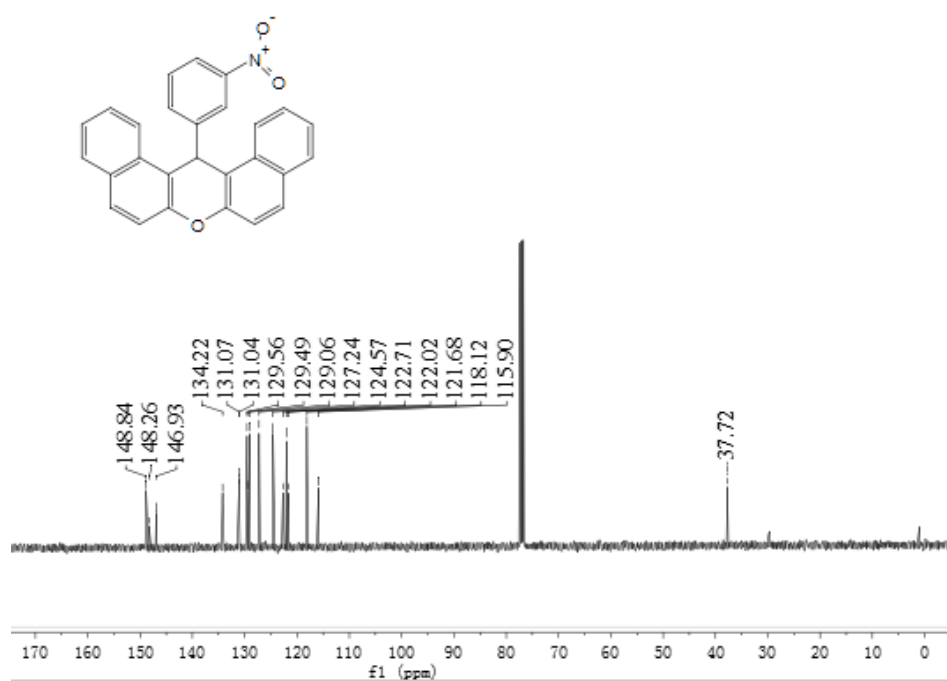



### <sup>1</sup>H-NMR of 3g

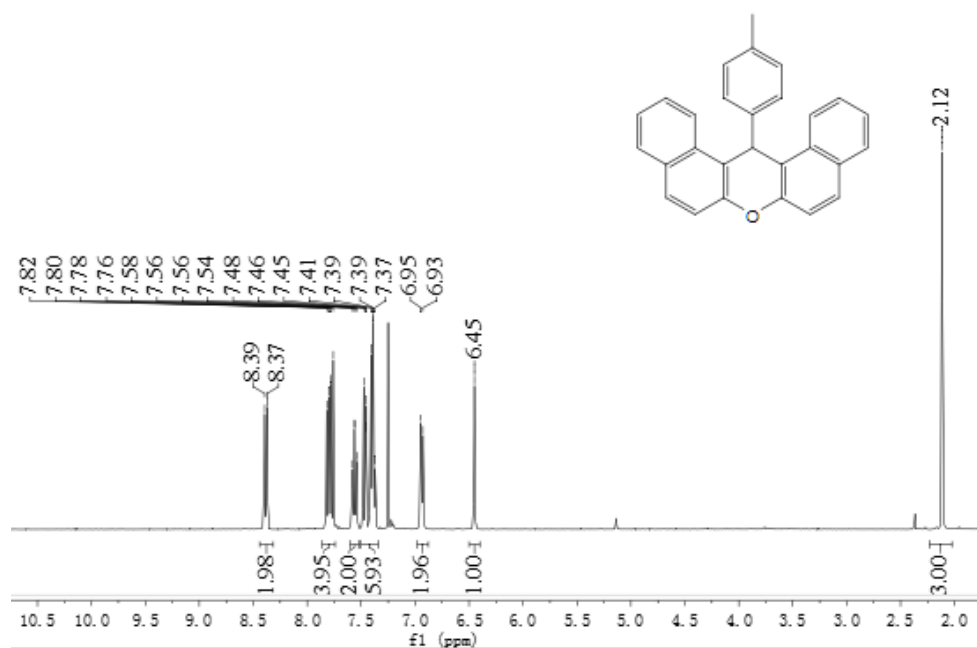

### <sup>13</sup>C-NMR of 3g

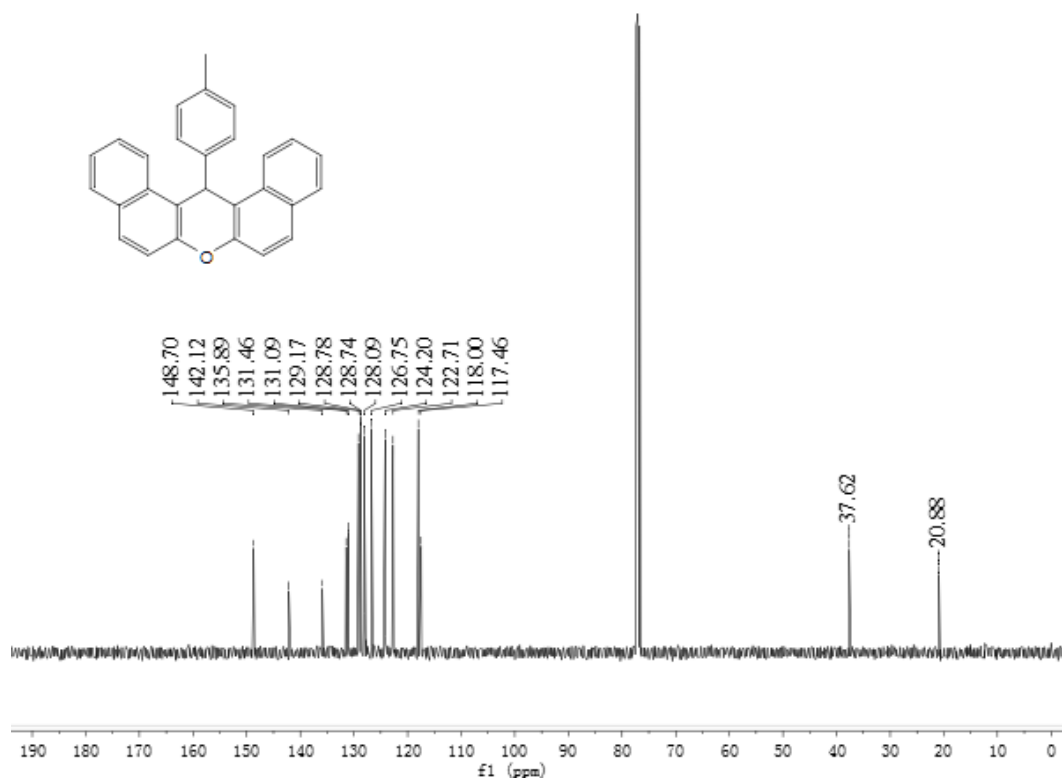

### <sup>1</sup>H-NMR of 3h

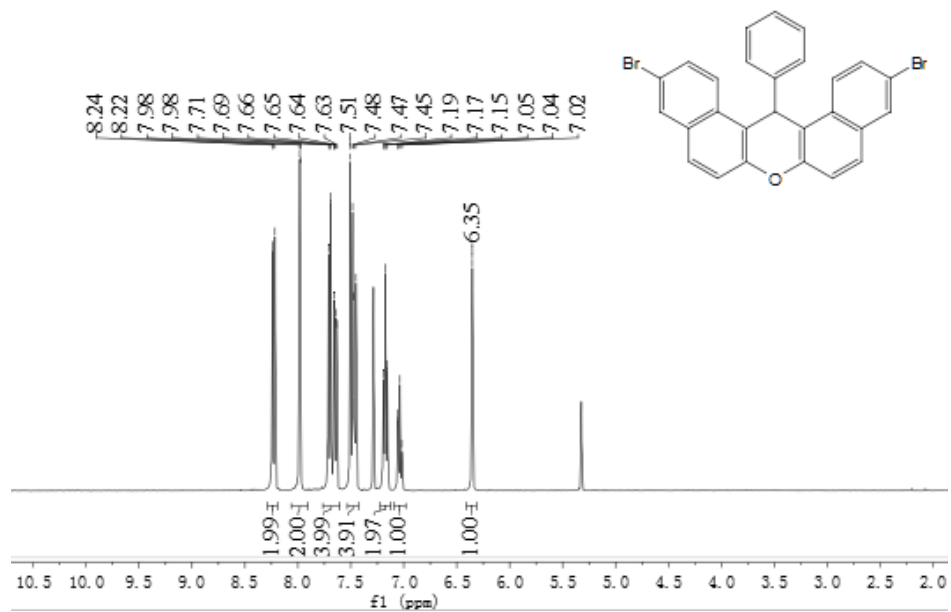

### <sup>13</sup>C-NMR of 3h

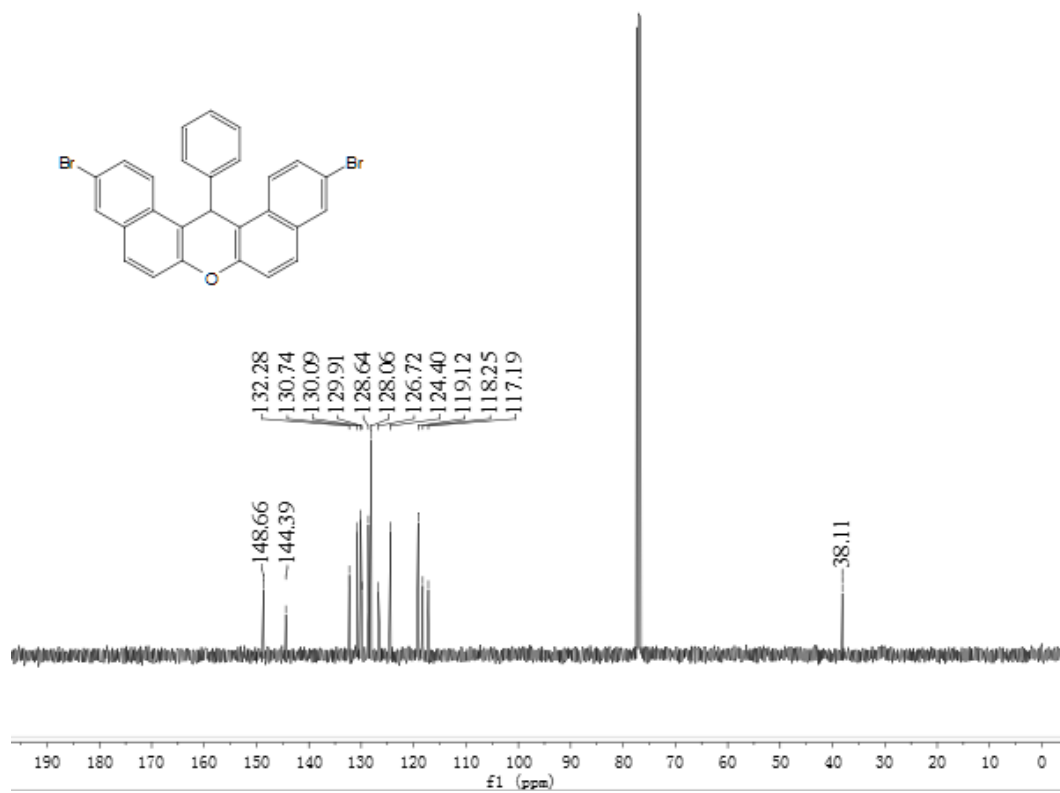

### <sup>1</sup>H-NMR of 3i

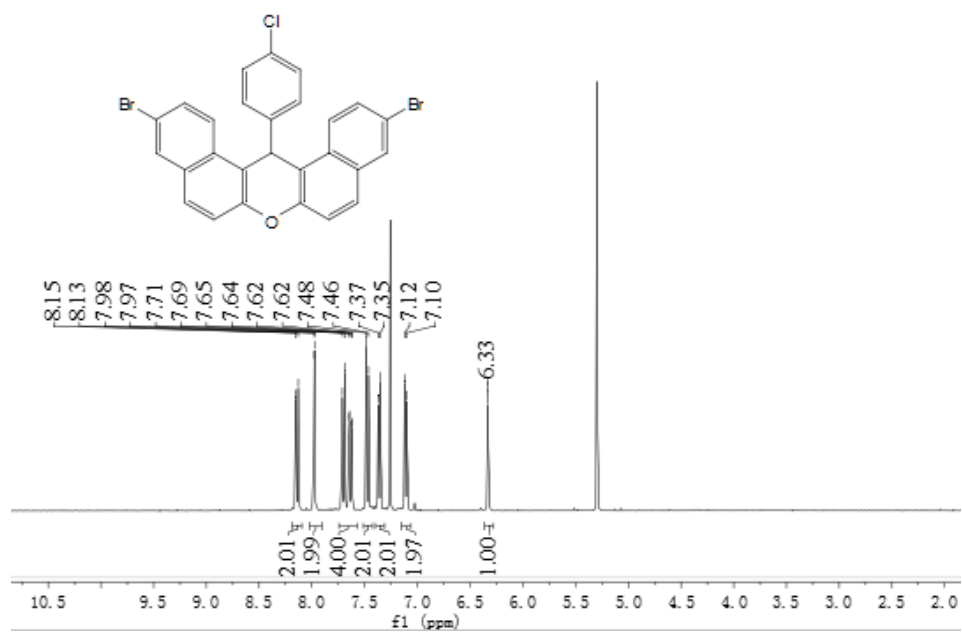

### <sup>13</sup>C-NMR of 3i

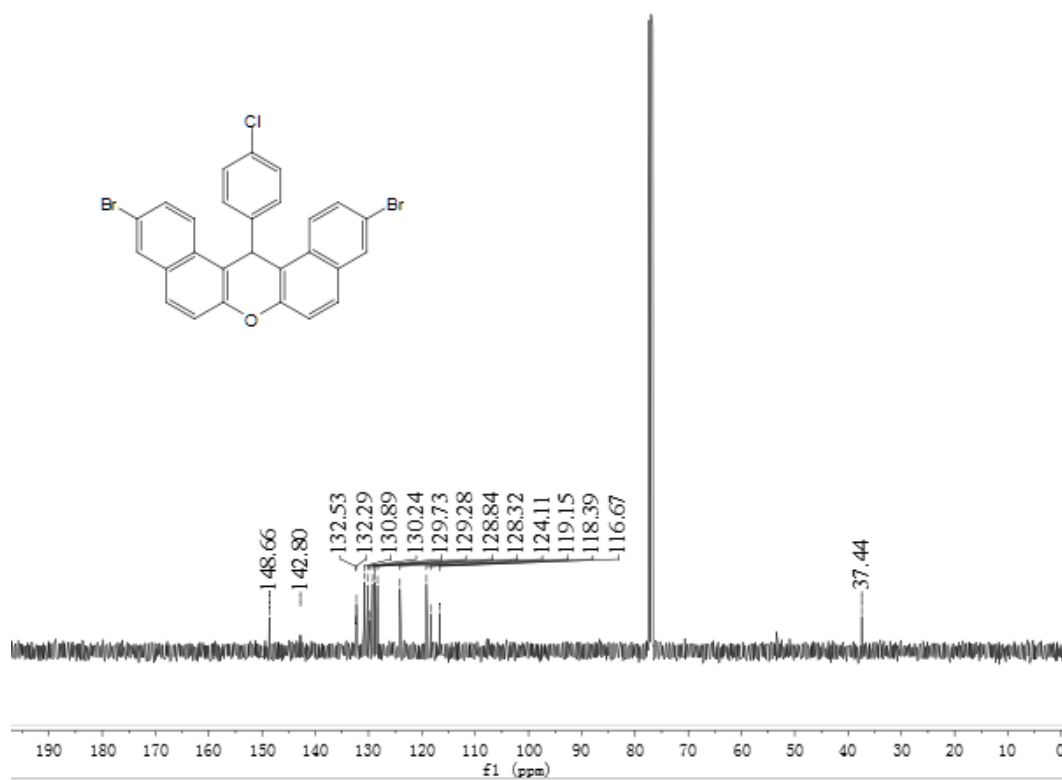

### <sup>1</sup>H-NMR of 3j

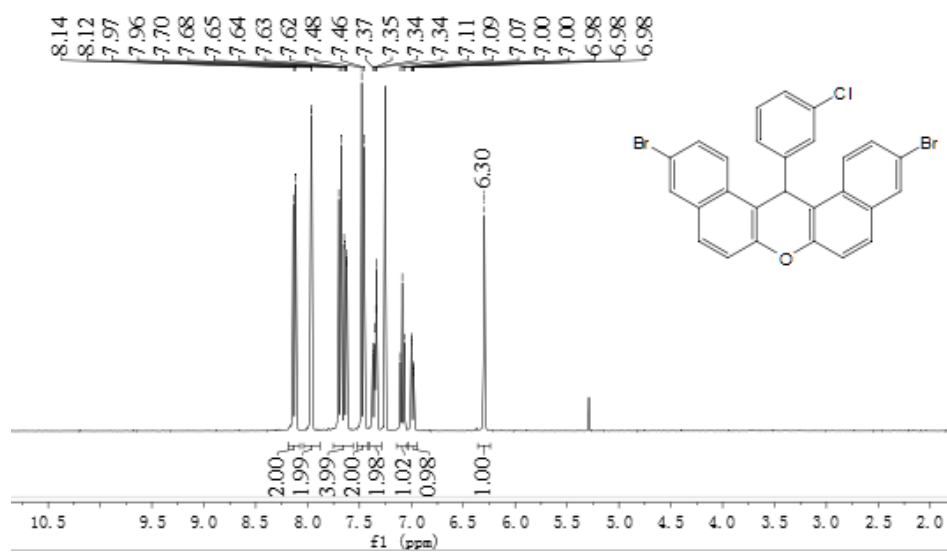

### <sup>13</sup>C-NMR of 3j

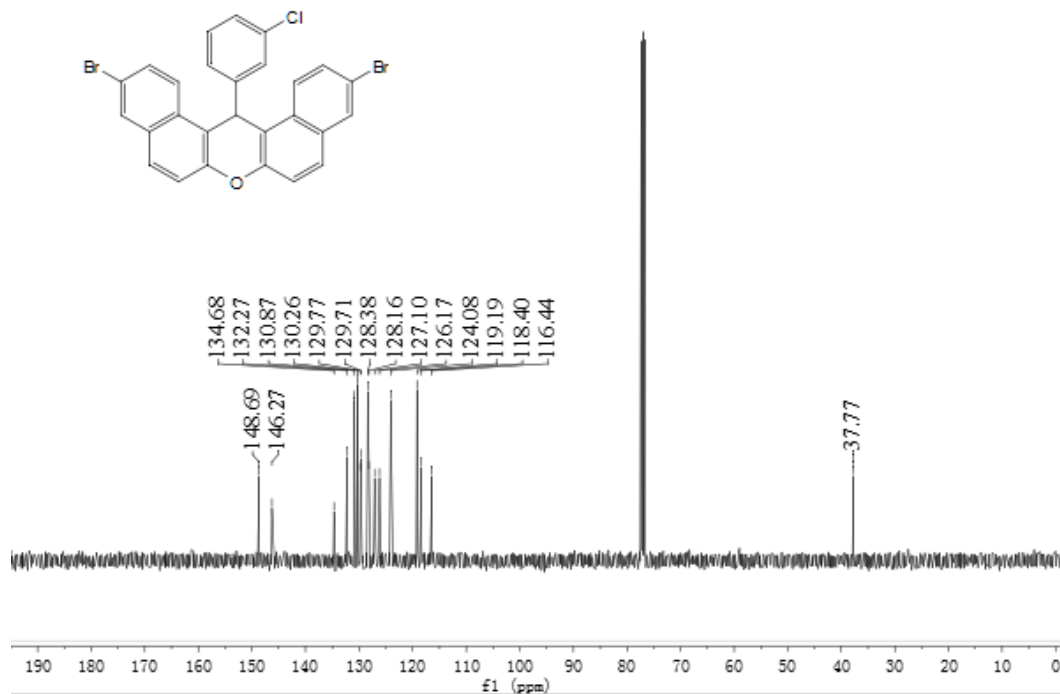

### <sup>1</sup>H-NMR of 3k

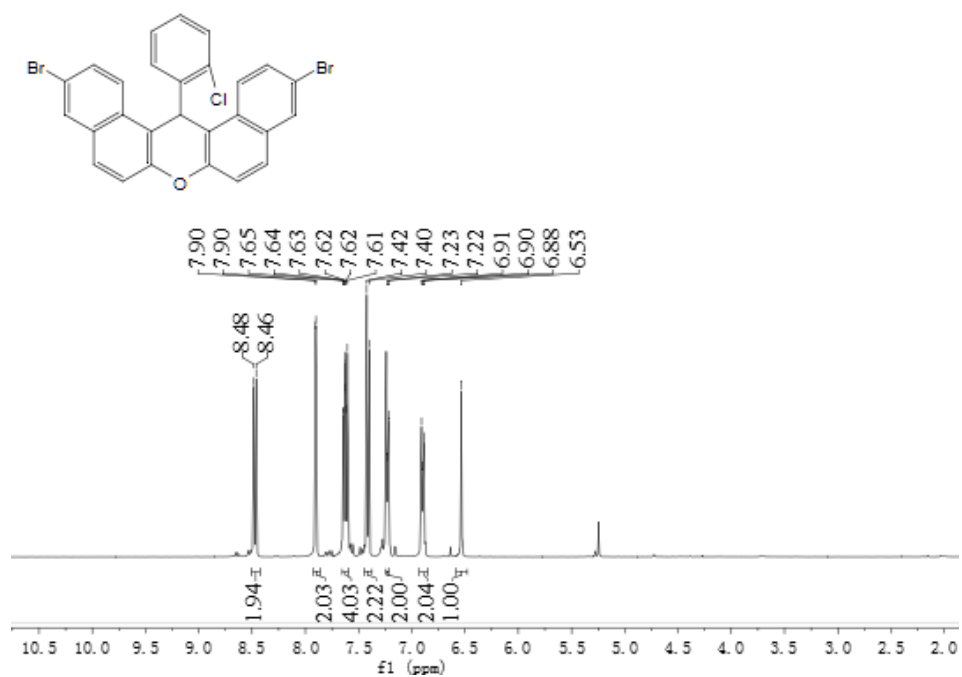

### <sup>13</sup>C-NMR 3k

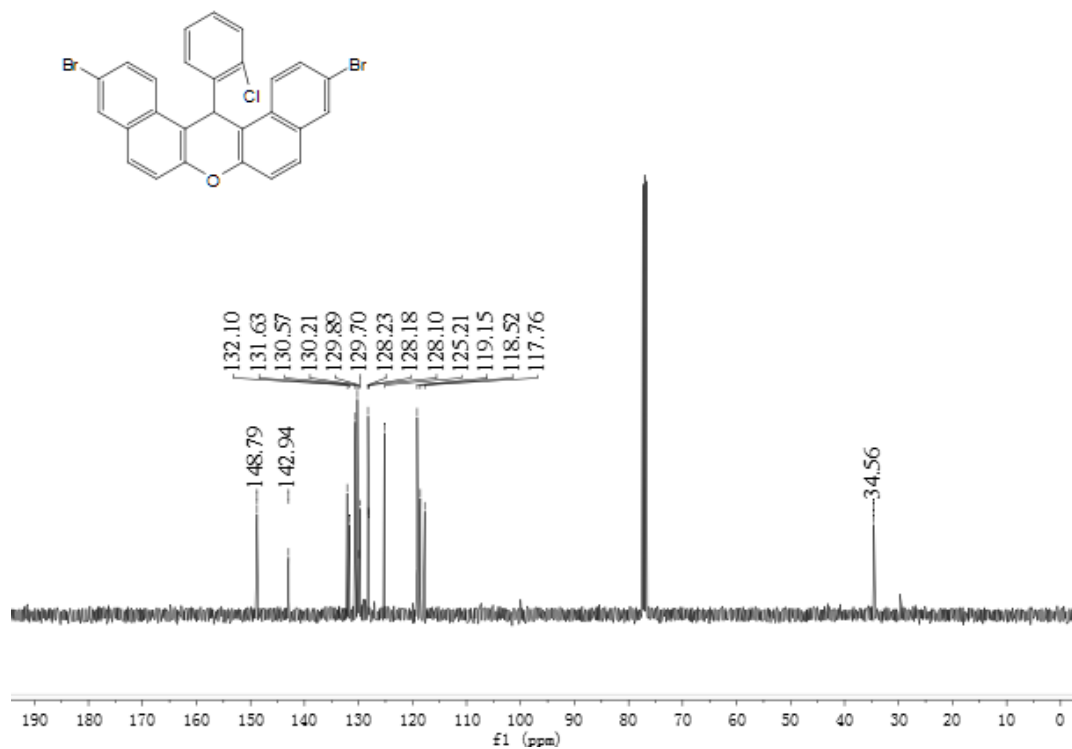

### <sup>1</sup>H-NMR of 3l

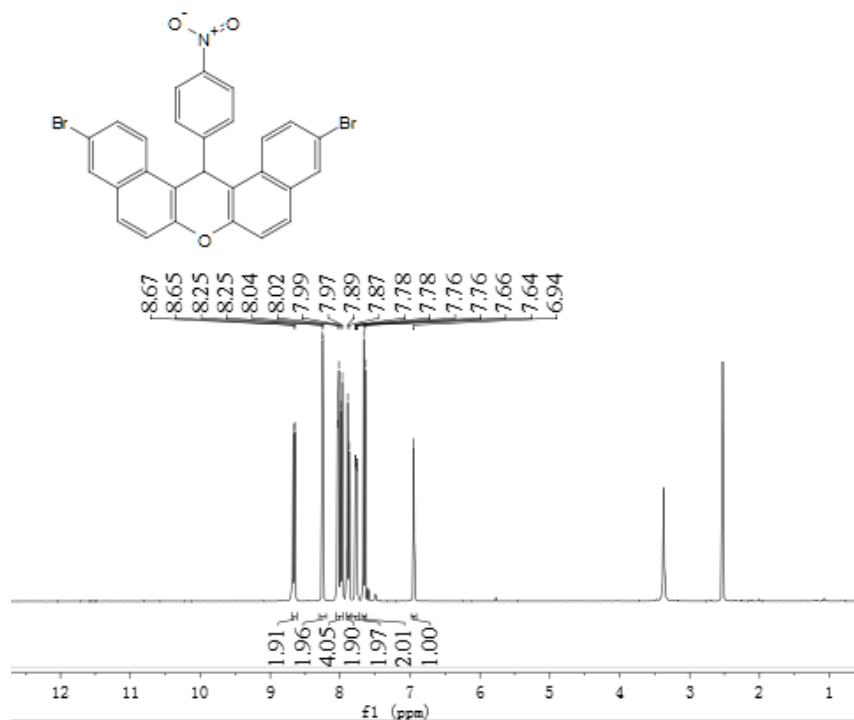

### <sup>13</sup>C-NMR of 3l

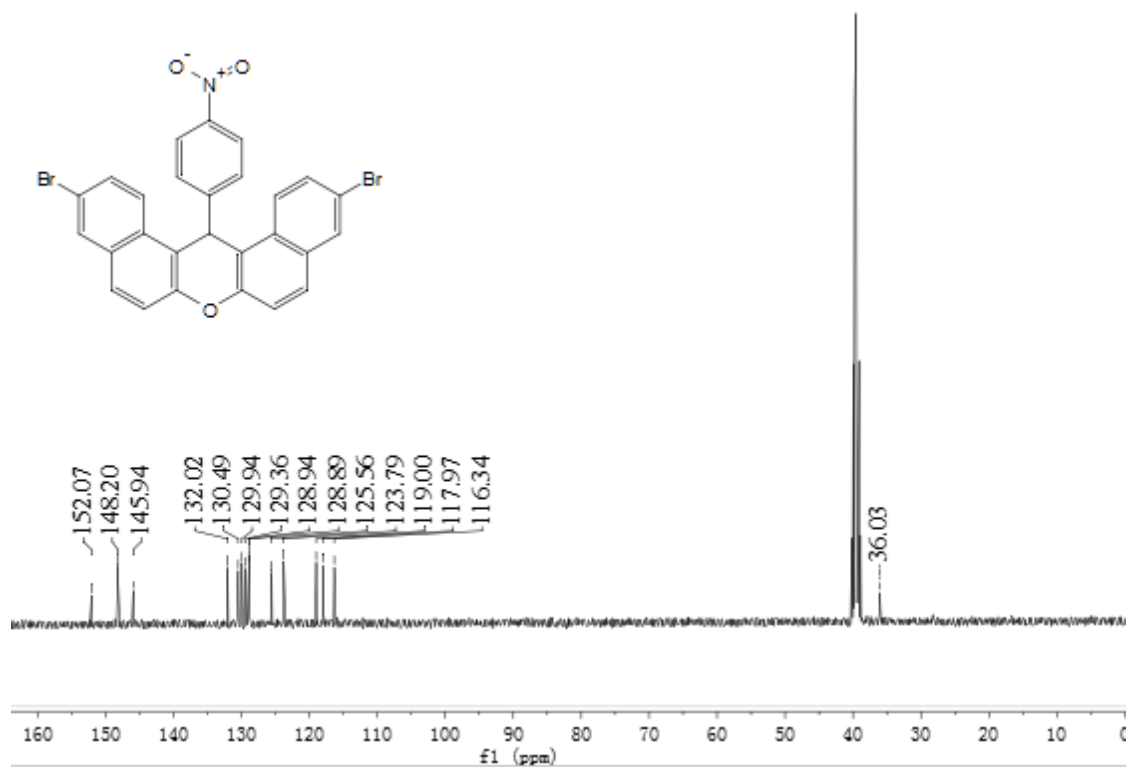



### <sup>1</sup>H-NMR of 3n

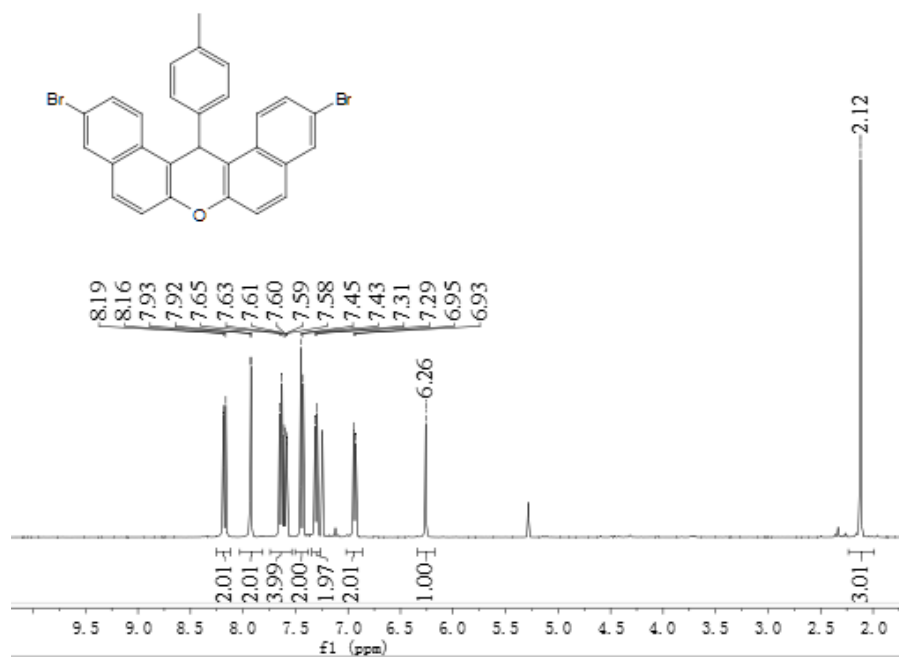

### <sup>13</sup>C-NMR of 3n

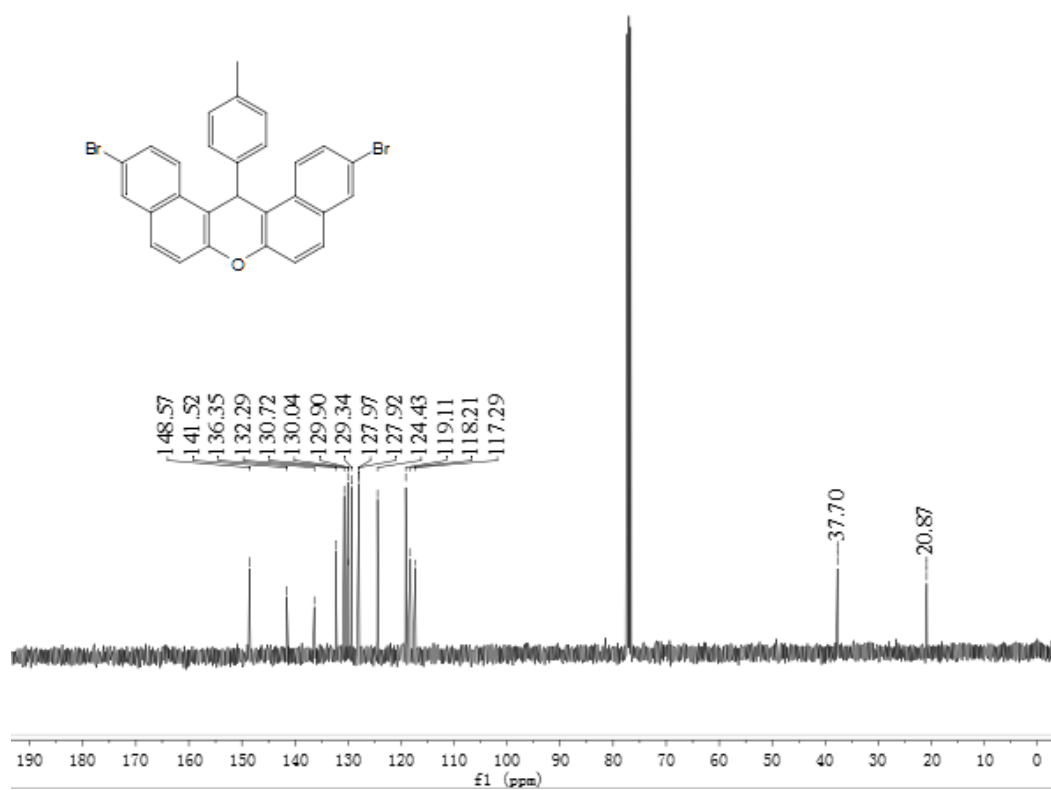



### <sup>1</sup>H-NMR of 3o

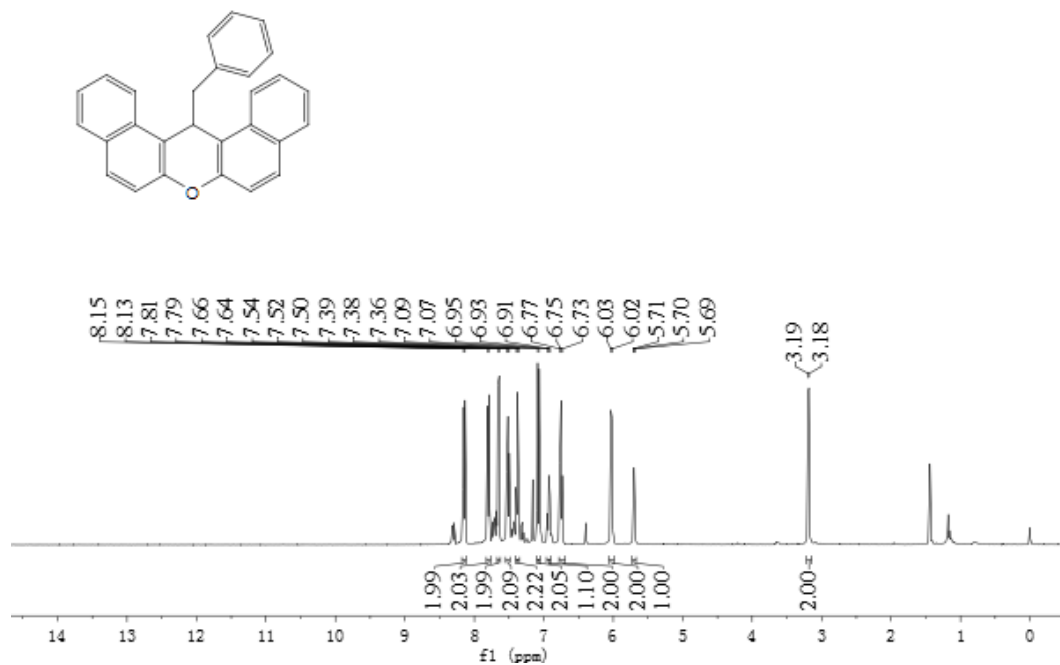

### <sup>13</sup>C-NMR of 3o

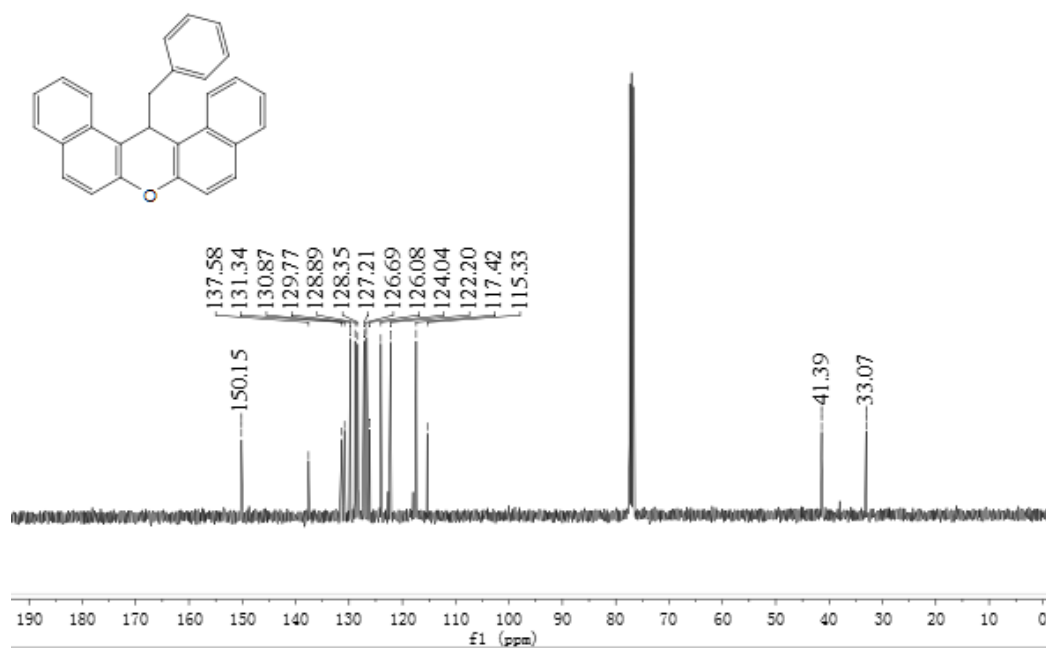



### <sup>1</sup>H-NMR of 3q

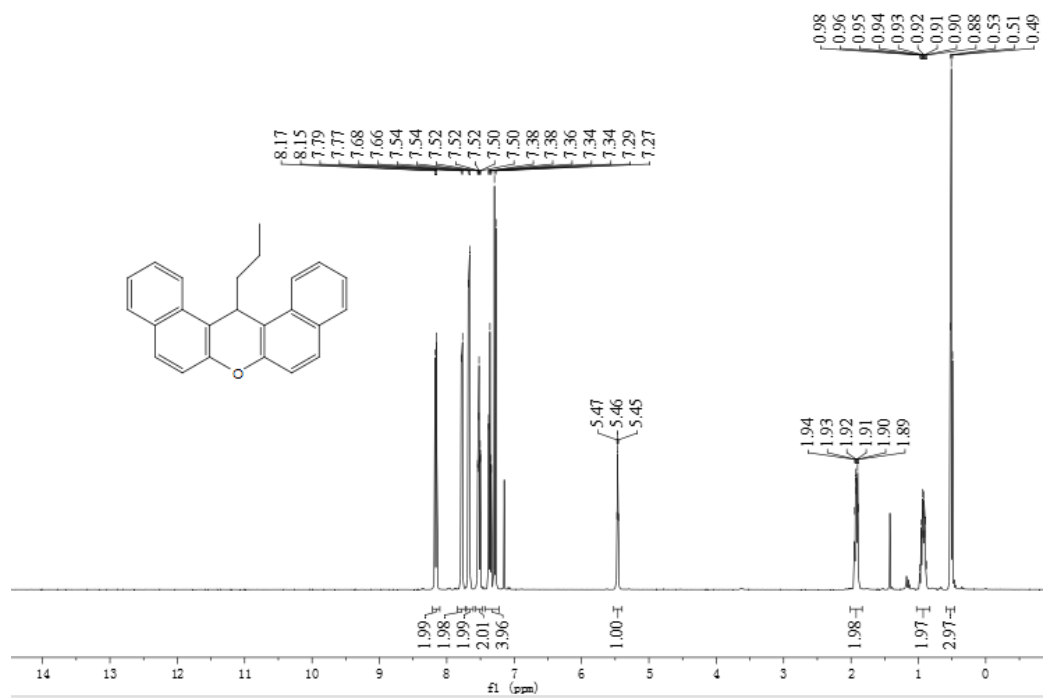

### <sup>13</sup>C-NMR of 3q

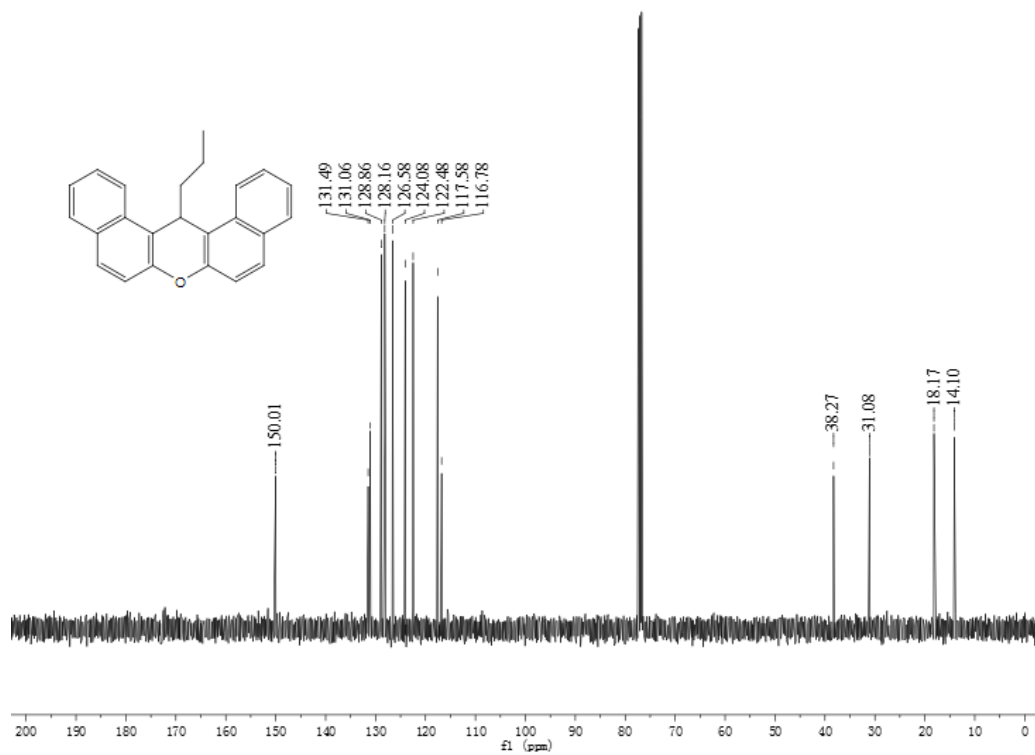

### <sup>1</sup>H-NMR of 3r

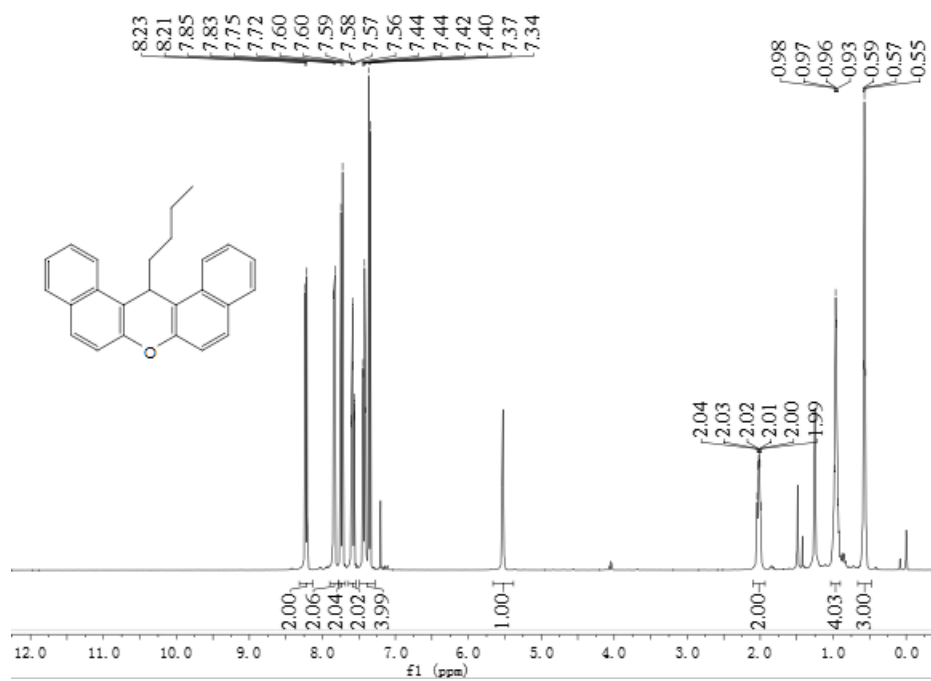

### <sup>13</sup>C-NMR of 3r

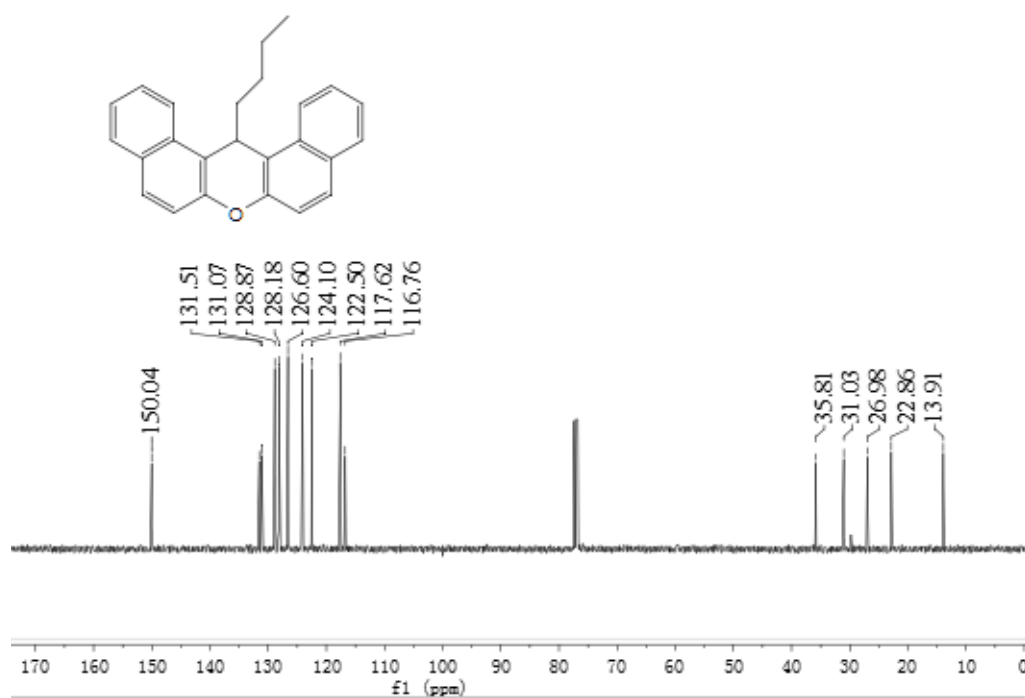

### <sup>1</sup>H-NMR of 3s

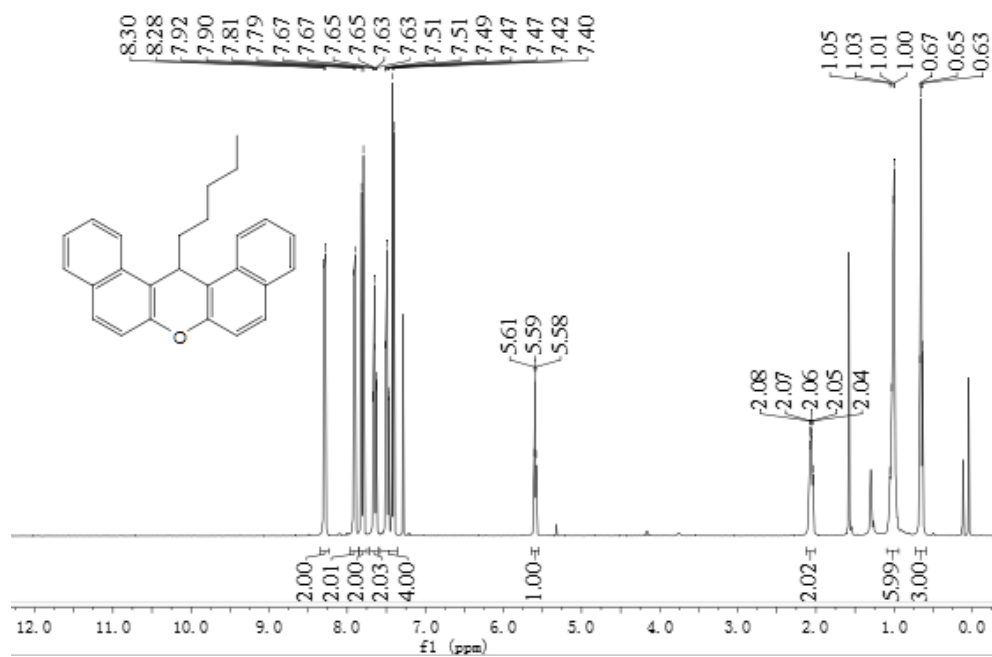

### <sup>13</sup>C-NMR of 3s

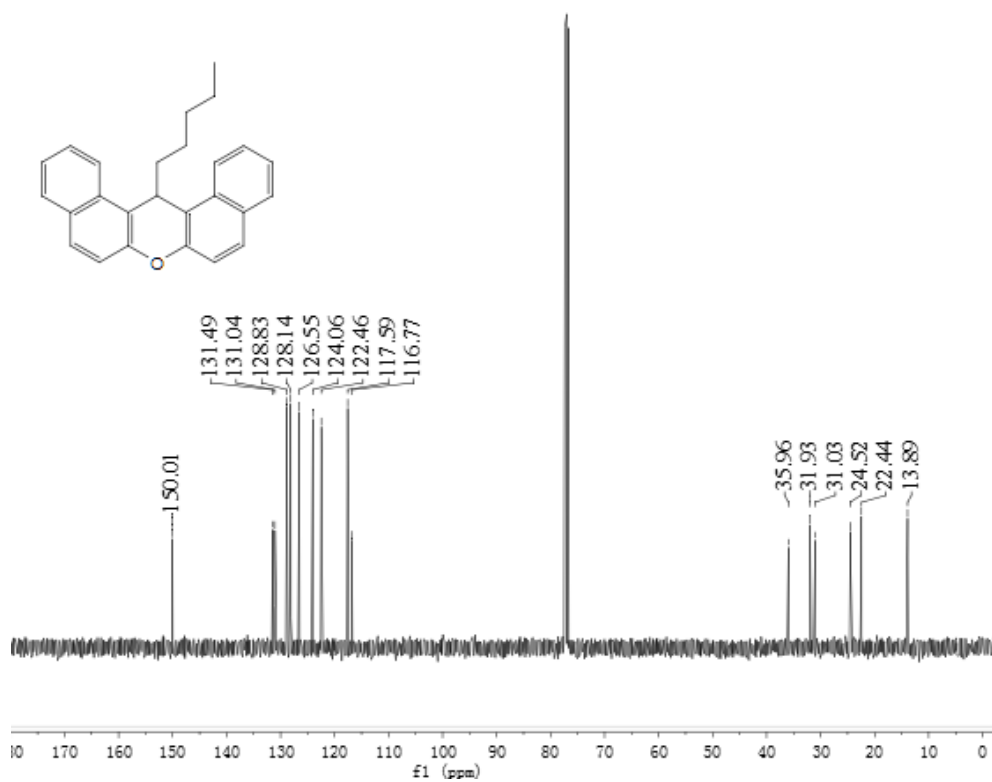

### <sup>1</sup>H-NMR of 3t

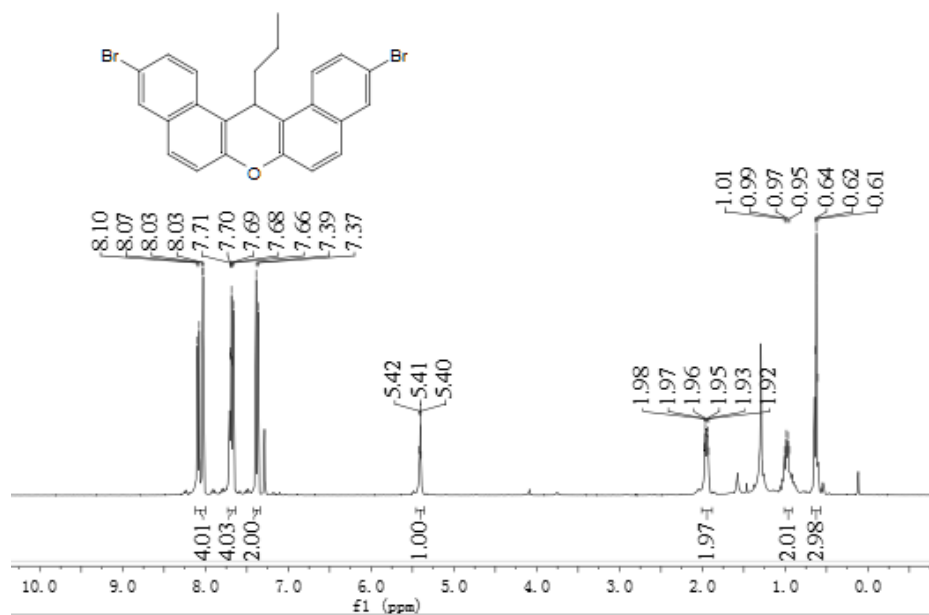

### <sup>13</sup>C-NMR of 3t

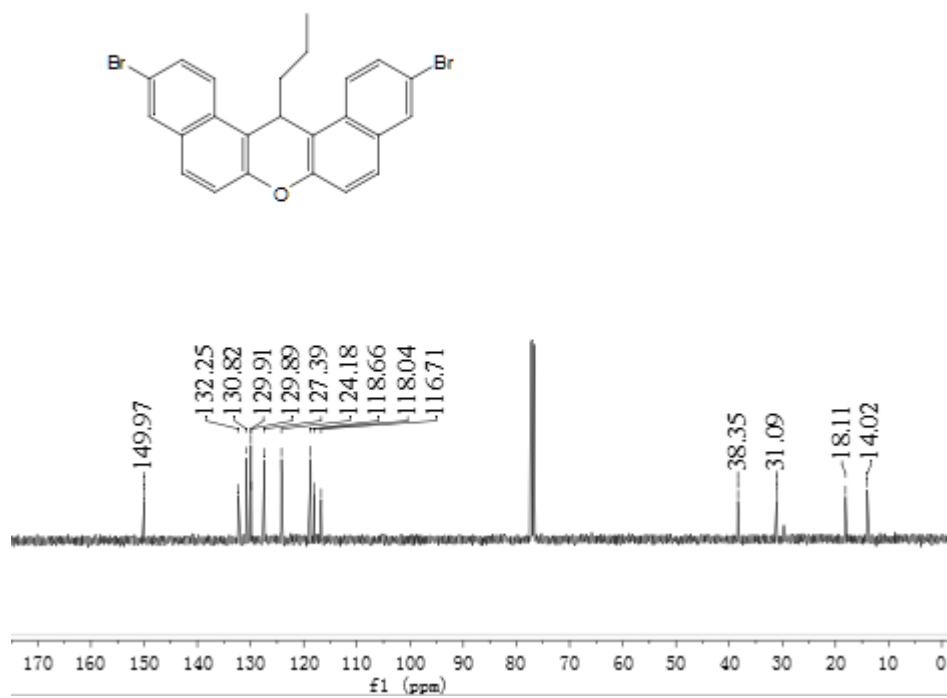

### <sup>1</sup>H-NMR of 3u

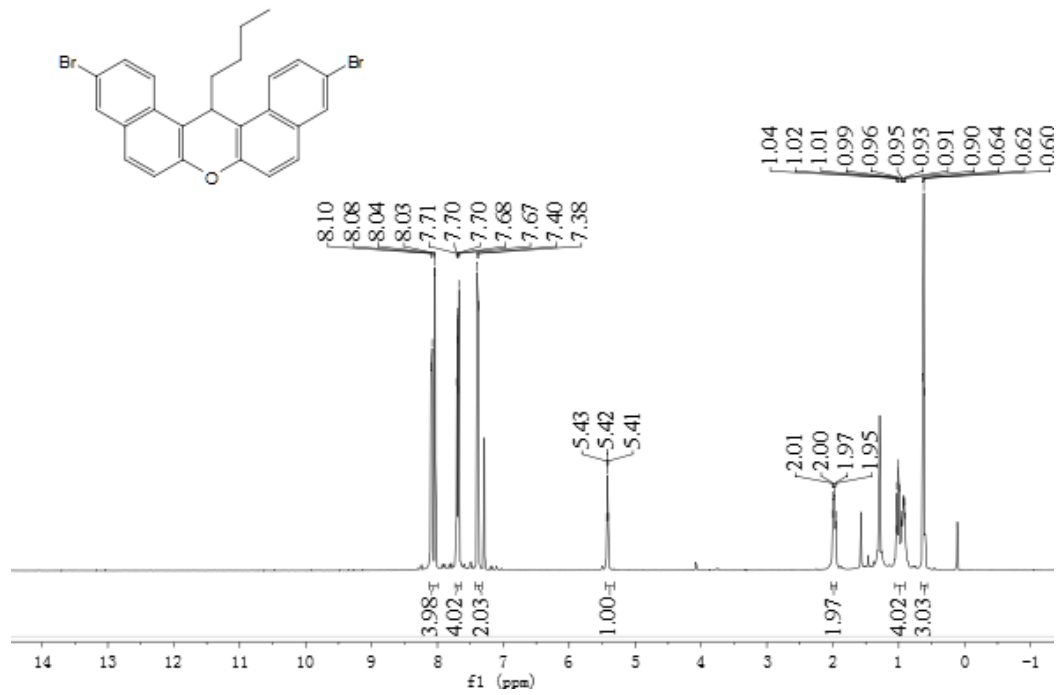

### <sup>13</sup>C-NMR of 3u

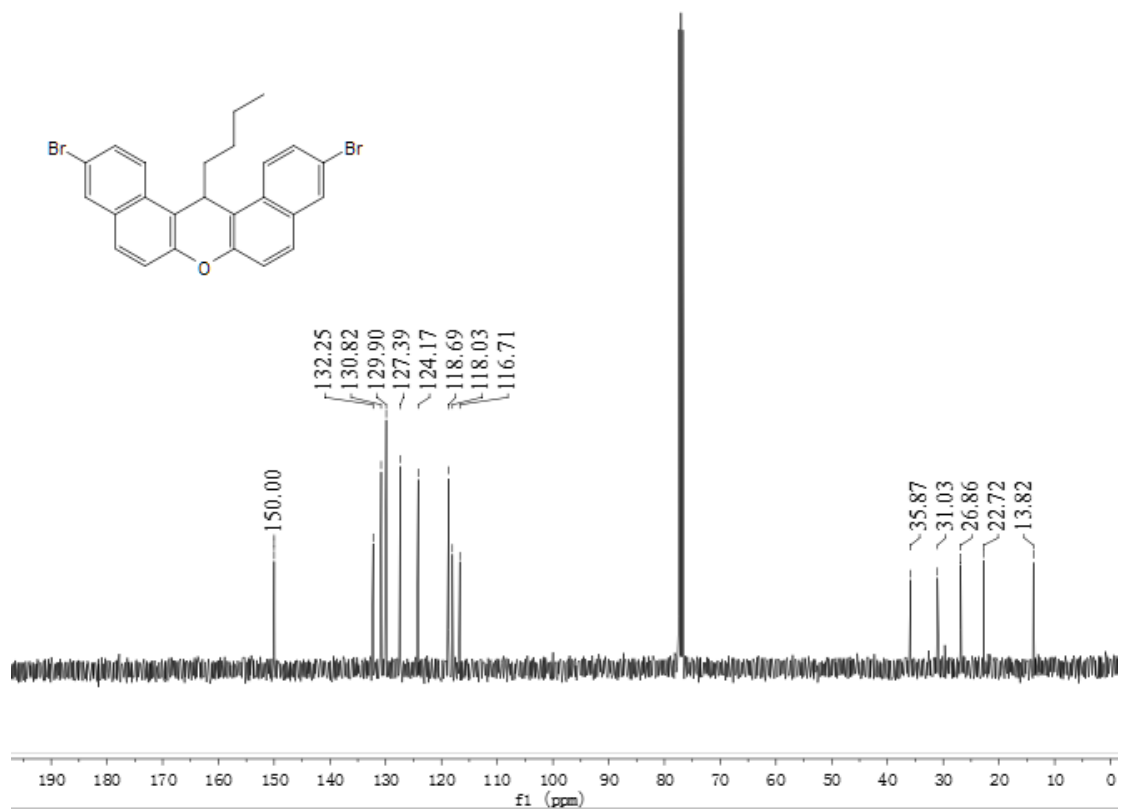

### <sup>1</sup>H-NMR of 3v

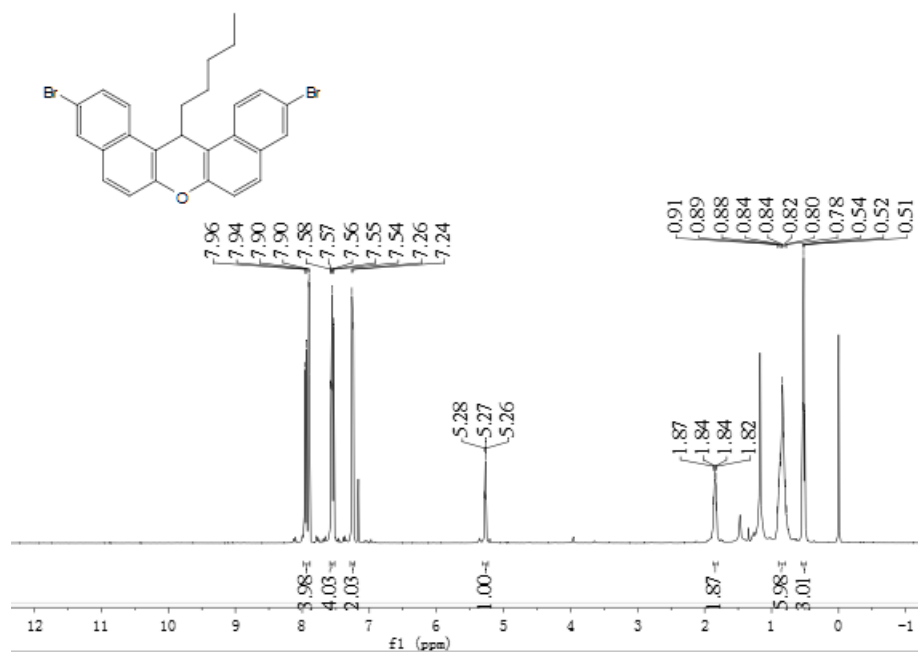

### <sup>13</sup>C-NMR of 3v

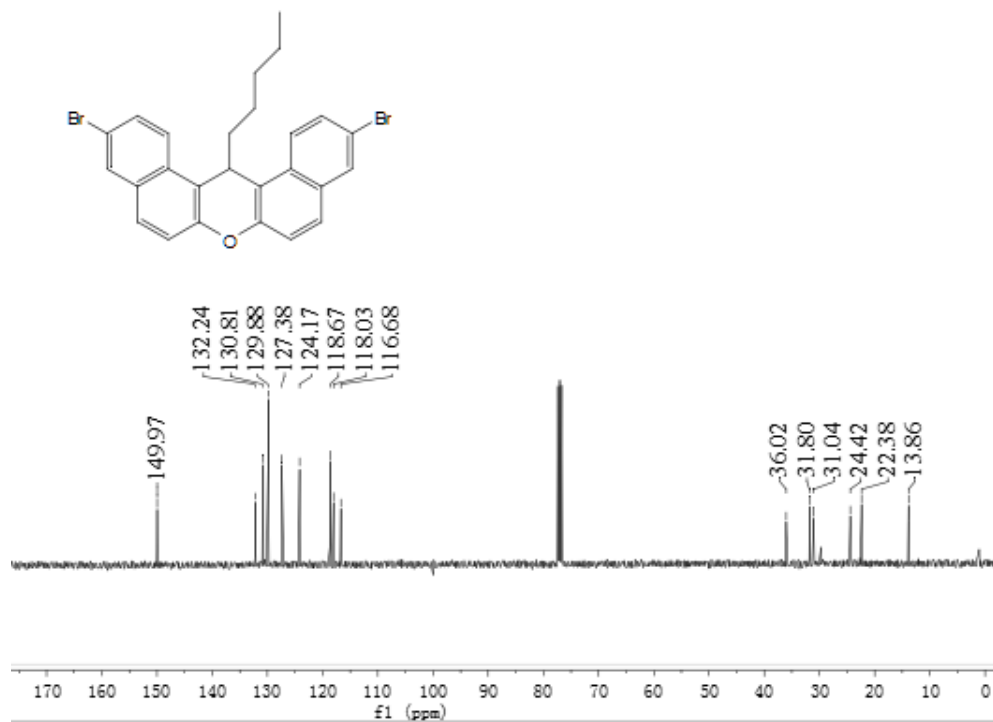

Supplement: c4ra00039k1.pdf [file c4ra00039k1.pdf]
